# Supplementary material for: Association between allergen-specific immunoglobulin E positivity, allergic rhinitis symptoms, and quality of life in school-aged children
Source: Research Square preprint supplement (doi:10.21203/rs.3.rs-5060853/v1), 2024-11-19
Supplement: Supplementary file 1 [file 4a2b2b2713f5c5cbf72d2589.pdf]

## **Supplementary information**

**Association between allergen-specific immunoglobulin E positivity, allergic rhinitis symptoms, and quality of life (QOL) in school-aged children**

Daisuke Watanabe<sup>1</sup>, Sanae Otawa<sup>2</sup>, Megumi Kushima<sup>2</sup>, Hideki Yui<sup>2</sup>, Ryoji Shinohara<sup>2</sup>,  
Zentaro Yamagata<sup>2</sup>, Daiju Sakurai<sup>1</sup>, Kunio Miyake<sup>3\*</sup>, and the Yamanashi Adjunct Study  
of the Japan Environment and Children's Study Group<sup>4</sup>

**Supplementary Table S1. Relationship between HDM-specific IgE sensitization and allergic rhinitis symptoms**

| HDM-specific IgE | Symptoms of perennial allergic rhinitis |            | p-value |
|------------------|-----------------------------------------|------------|---------|
|                  | No                                      | Yes        |         |
| Negative         | 504 (88.0)                              | 69 (12.0)  | < 0.001 |
| Positive         | 380 (57.9)                              | 276 (42.1) |         |

p-values were obtained from the chi-square test.

**Supplementary Table S2. Relationship between JCP-specific IgE sensitization and allergic rhinitis symptoms**

| JCP -specific IgE | Symptoms of seasonal allergic rhinitis |            | p-value |
|-------------------|----------------------------------------|------------|---------|
|                   | No                                     | Yes        |         |
| Negative          | 210 (55.9)                             | 166 (44.1) | < 0.001 |
| Positive          | 120 (14.6)                             | 700 (85.4) |         |

p-values were obtained from the chi-square test.

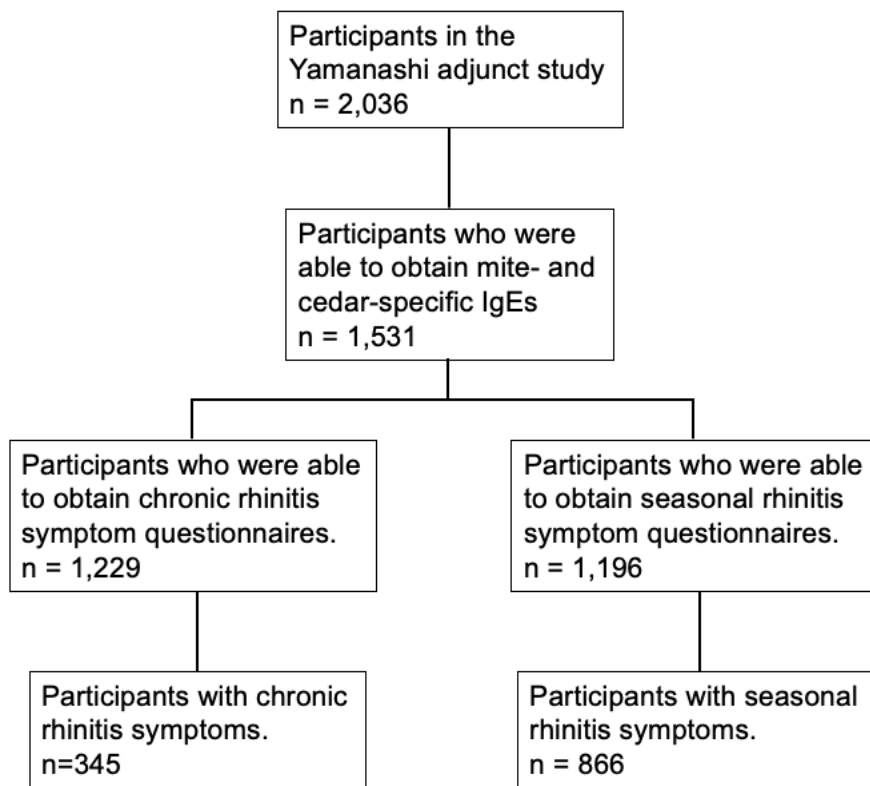

**Supplementary Figure S1.** Flow chart of the participants.

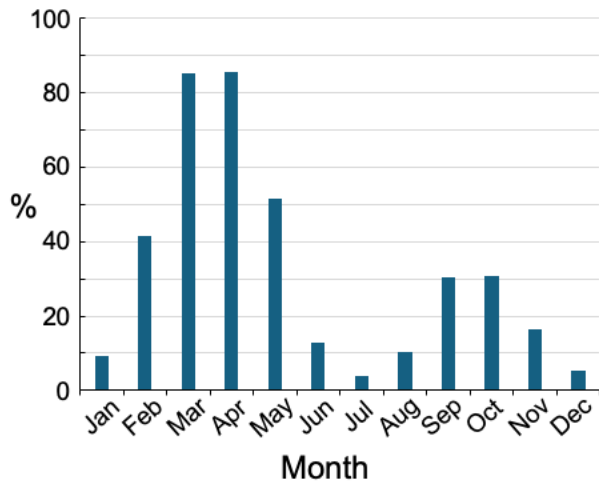

**Supplementary Figure S2.** Months when SAR symptoms appear
